# Supplementary material for: Confidence-based Somatic Mutation Evaluation and Prioritization
Source: PLoS Comput Biol. 2012 Sep 27;8(9):e1002714. doi: 10.1371/journal.pcbi.1002714 (PMC3459886; doi:10.1371/journal.pcbi.1002714)
Supplement: Dataset S2 — Validation results for mutations with an intermediate FDR. (XLS) [file pcbi.1002714.s002.xls]

## Sheet: Tabelle1
mutation	number of programs	FDR bin	validated ? (1=yes, 0=no, -1=inconclusive)	Validated by Sanger sequencing	Validated by RNA-Seq	FDR
chr10:7309982	1	0.1-0.2	1	yes		0.152635		number of programs	number of validated mutations per program category
chr2:143814359	1	0.1-0.2	0			0.19658		1	3
chr4:115001564	1	0.1-0.2	0			0.19658		2	4
chr1:172898154	1	0.2-0.3	0			0.25886		3	8
chr12:86315114	1	0.2-0.3	0			0.25886
chr5:87894457	1	0.2-0.3	0			0.26002
chr2:87297808	1	0.3-0.4	0			0.384279		FDR bin	number of validated mutations per FDR bin
chr16:59329156	1	0.3-0.4	0			0.384279		0.1-0.2	4
chr2:166401264	1	0.3-0.4	1	yes		0.384279		0.2-0.3	0
chr1:36996142	1	0.4-0.5	-1			0.407171		0.3-0.4	5
chr4:106120273	1	0.4-0.5	0			0.407171		0.4-0.5	6
chr12:4107898	1	0.4-0.5	1		yes	0.407171		0.5-0.6	1
chr13:49242592	1	0.5-0.6	-1			0.524539
chr7:148823845	1	0.5-0.6	0			0.524539
chr11:78364096	1	0.5-0.6	0			0.524539
chr2:26092600	2	0.1-0.2	1		yes	0.152635
chr12:29334505	2	0.1-0.2	-1			0.15572
chr2:54732484	2	0.1-0.2	0			0.190395
chr7:13167758	2	0.2-0.3	0			0.211126
chr9:109778461	2	0.2-0.3	-1			0.25886
chr15:101293986	2	0.2-0.3	0			0.25886
chr11:109652956	2	0.3-0.4	0			0.30695
chr8:73304304	2	0.3-0.4	1		yes	0.30695
chr5:104888831	2	0.3-0.4	-1			0.398243
chr10:116813997	2	0.4-0.5	-1			0.407171
chr4:130037447	2	0.4-0.5	0			0.407171
chr5:28493156	2	0.4-0.5	1	yes	yes	0.407171
chr17:32768505	2	0.5-0.6	0			0.524539
chr5:117565778	2	0.5-0.6	1		yes	0.524539
chr9:98856813	2	0.5-0.6	-1			0.566177
chr13:21575766	3	0.1-0.2	1	yes		0.128326
chr4:138990033	3	0.1-0.2	1		yes	0.131526
chr16:43871852	3	0.1-0.2	0			0.152635
chr7:110709904	3	0.2-0.3	-1			0.284158
chr1:154671388	3	0.2-0.3	0			0.284158
chr4:151534480	3	0.2-0.3	0			0.284158
chr17:30823395	3	0.3-0.4	1	yes		0.305451
chr7:125321913	3	0.3-0.4	1	yes	yes	0.30695
chr19:37061108	3	0.3-0.4	1	yes	yes	0.30695
chr5:138038195	3	0.4-0.5	1		yes	0.407171
chr1:187235084	3	0.4-0.5	1		yes	0.407171
chr2:111098016	3	0.4-0.5	1	yes		0.524156
chr5:82075712	3	0.5-0.6	0			0.535316
chr2:92208002	3	0.5-0.6	0			0.535316
chr6:22974726	3	0.5-0.6	0			0.53556
