# Supplementary material for: Confidence-based Somatic Mutation Evaluation and Prioritization
Source: PLoS Comput Biol. 2012 Sep 27;8(9):e1002714. doi: 10.1371/journal.pcbi.1002714 (PMC3459886; doi:10.1371/journal.pcbi.1002714)
Supplement: Dataset S3 — Alignment statistics for all samples. (XLS) [file pcbi.1002714.s003.xls]

## Sheet: Tabelle1
library	black6.1	black6.2	black6.3	B16.1	B16.2	B16.3
#reads	100510821	104263002	104313375	104671967	104947958	104301110
aligned uniquely	80497491	83433703	83907053	83367584	83693041	83520920
% aligned uniquely	80.0884	80.0223	80.4375	79.6465	79.7472	80.0767
aligned on target	39012052	40301215	40527832	40707291	41007510	41146982
% on target	48.4637	48.3033	48.3009	48.8287	48.9975	49.2655
library	black6.1_PE	black6.1_PE	B16.1_PE	B16.1_PE
Read	1	2	1	2
# reads	107215053	107215053	109378941	109378941
# read alignments 1x100	86983556		89169149
% read alignments 1x100	81.13		81.5231
# fragments on target 1x100	48101593		50889911
% fragments on target 1x100	44.8646		46.5262
# read alignments* 2x100	180625956		186594386
% read alignments* 2x100	84.2354		85.2972
# fragments on target 2x100	56525629		60968684
% fragments on target 2x100	52.7217		55.7408
# read alignments 1x50	86735043		88269954
% read alignments 1x50	80.8982		80.7011
# fragments on target 1x50	42737886		44394001
% fragments on target 1x50	39.8618		40.5873
# read alignments* 2x50	178754755		177546051
% read alignments* 2x50	83.3627		81.161
# fragments on target 2x50	55055988		58678251
% fragments on target 2x50	51.351		53.6468
* part ofproperly mapped pairs
library	Black6.1_RNA	Black6.3_RNA	Black6.3_RNA
#reads	29761551	30778933	17241256
aligned to reference genome	21064967	23926281	13601673
aligned to junctions	2835421	3233624	1790749
total	23900388	27159905	15392422
total %	80.3063	88.2419	89.2767
