# Supplementary material for: Confidence-based Somatic Mutation Evaluation and Prioritization
Source: PLOS journal article supplement (doi:10.1371/journal.pcbi.1002714), 2012-09-27
Supplement: S5 (10.1371/journal.pcbi.1002714.s005) [file journal.pcbi.1002714.s005]

301 Moved Permanently

# Moved Permanently

The document has moved here.

---

Apache Server at www.ploscompbiol.org Port 80
